# Supplementary material
Source: PubMed Central journal article supplement (PMC2901433)
Supplement: 1005191107_pnas.201005191SI.pdf [file 1005191107_pnas.201005191SI.pdf]

# Supporting Information

Marquart et al. 10.1073/pnas.10051911107

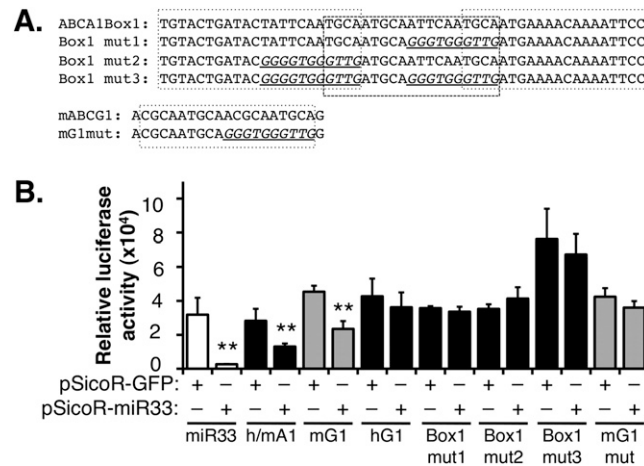

**Fig. S1.** Mutation of specific sequences abolishes miR-33-mediated silencing. (A) Natural and mutated ABCA1 Box 1 and ABCG1 response elements for miR-33. (B) HEK293 cells were transfected as described in Fig. 2, and luciferase activity was analyzed 48 h after transfection. Data are mean  $\pm$  SD of three independent experiments in duplicate.

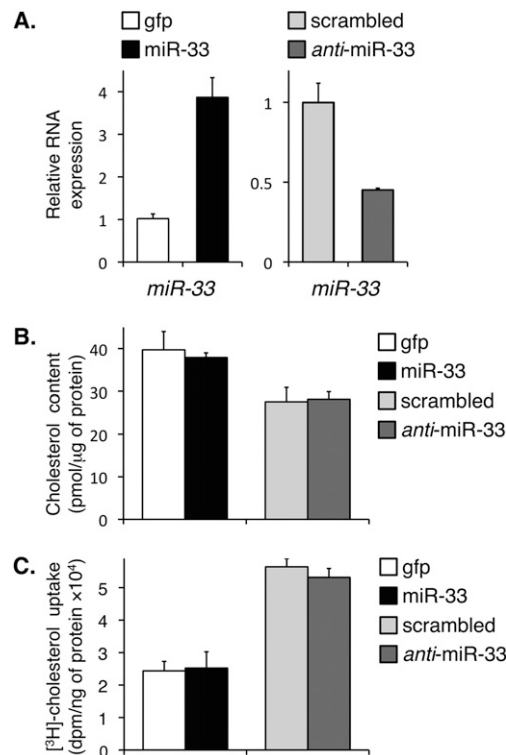

**Fig. S2.** Manipulation of miR-33 expression levels does not alter cholesterol uptake in HEK293 cells. Cells were transfected with an empty plasmid or a plasmid encoding miR-33, or with scrambled or miR33-specific hairpin inhibitors, as described in Fig. 3 A and B. (A and B) The expression of miR-33 (A) and total cholesterol and protein content (B) in the cells were measured 36 h posttransfection. (C) Some wells were then incubated overnight in media supplemented with 1  $\mu$ Ci/mL [<sup>3</sup>H]-cholesterol. The uptake of the labeled cholesterol (measured in dpm/ng of cell protein) was not altered following overexpression or silencing of miR-33. Data for the different panels are mean  $\pm$  SD of four (A) and eight (B and C) individual samples.

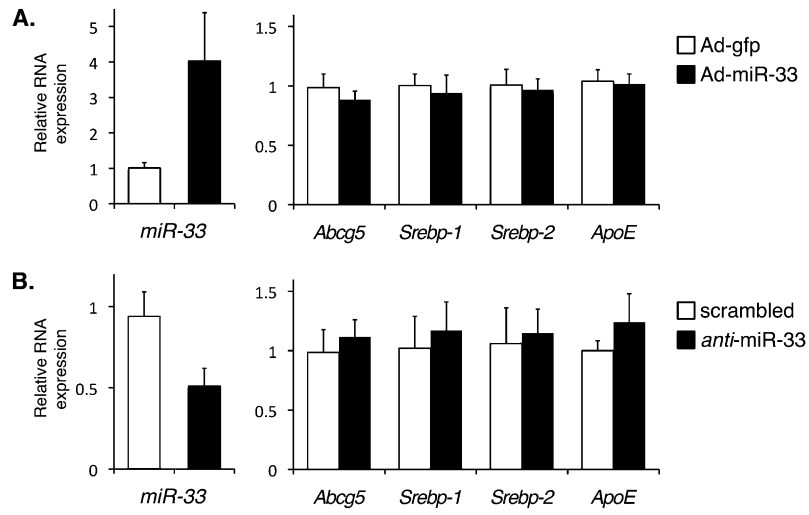

**Fig. 53.** Manipulation of miR-33 expression levels does not alter the expression of selected lipid-related genes in liver. Mice were infused with adenoviral vectors (A) or with antisense oligonucleotides (B), as described in Fig. 3 C–F. The expression of hepatic miR-33 and selected genes involved in lipid homeostasis was analyzed by real-time PCR. Data are mean ± SD; n = 5.
